# Supplementary material for: Modeling Niemann–Pick disease type C in a human haploid cell line allows for patient variant characterization and clinical interpretation
Source: PubMed Central journal article supplement — Genome Res. 2019 Dec;29(12):2010–9. doi: 10.1101/gr.250720.119 (PMC6886506; doi:10.1101/gr.250720.119), 2019-12
Supplement: supp_gr.250720.119_Supplemental_Figures.pdf [file supp_gr.250720.119_Supplemental_Figures.pdf]

## Supplemental Figures

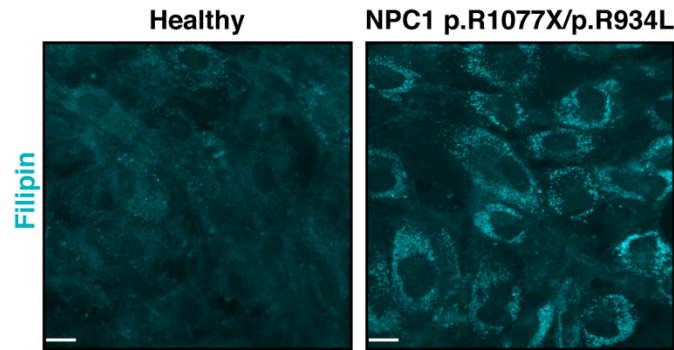

**Supplemental Figure S1. NPC patient-derived fibroblasts exhibit distinct foci of filipin staining.** Healthy donor (left) and patient-derived fibroblasts (right) display differential staining with filipin. Scale bars: 20 $\mu$ m.

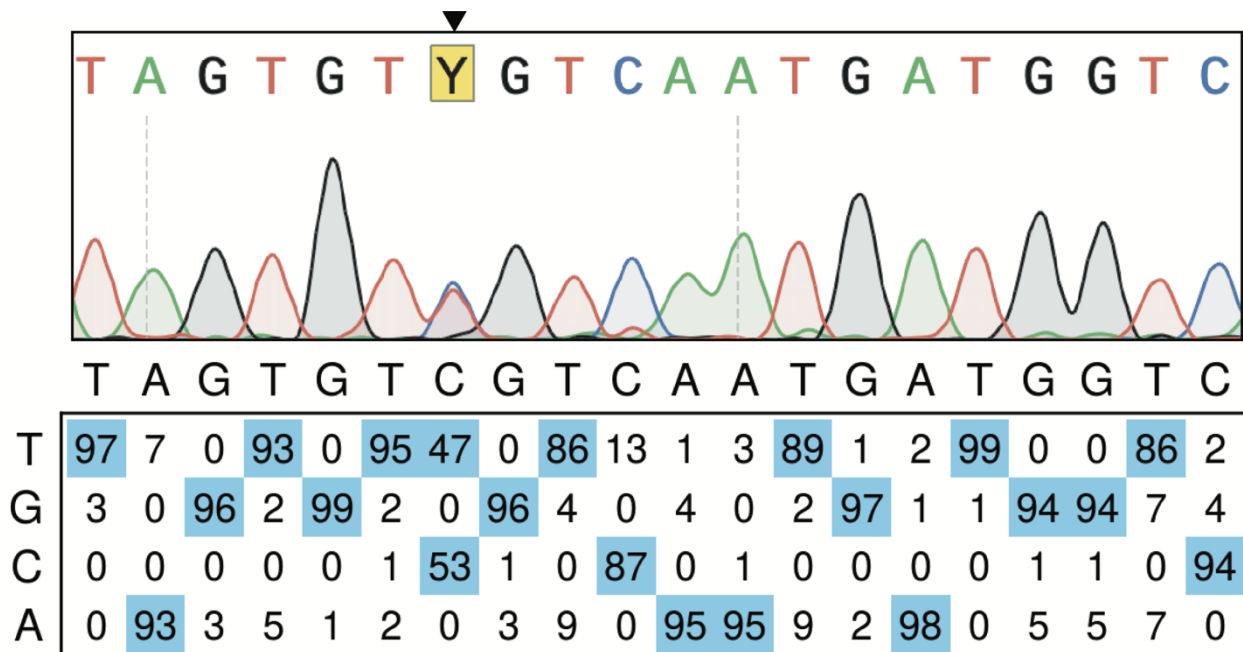

**Supplemental Figure S2. Base editing is detectable in a bulk population.** Top, a sequencing chromatogram from a bulk population of edited HAP1 cells targeting the NPC1 c.3289G>A locus (NPC1 p.D1097N). Arrowhead indicates the targeted base; Y annotation indicates a pyrimidine. Bottom, editing plot estimating the percent contribution of each nucleotide to each Sanger sequencing base call, demonstrating an editing rate of 47%.

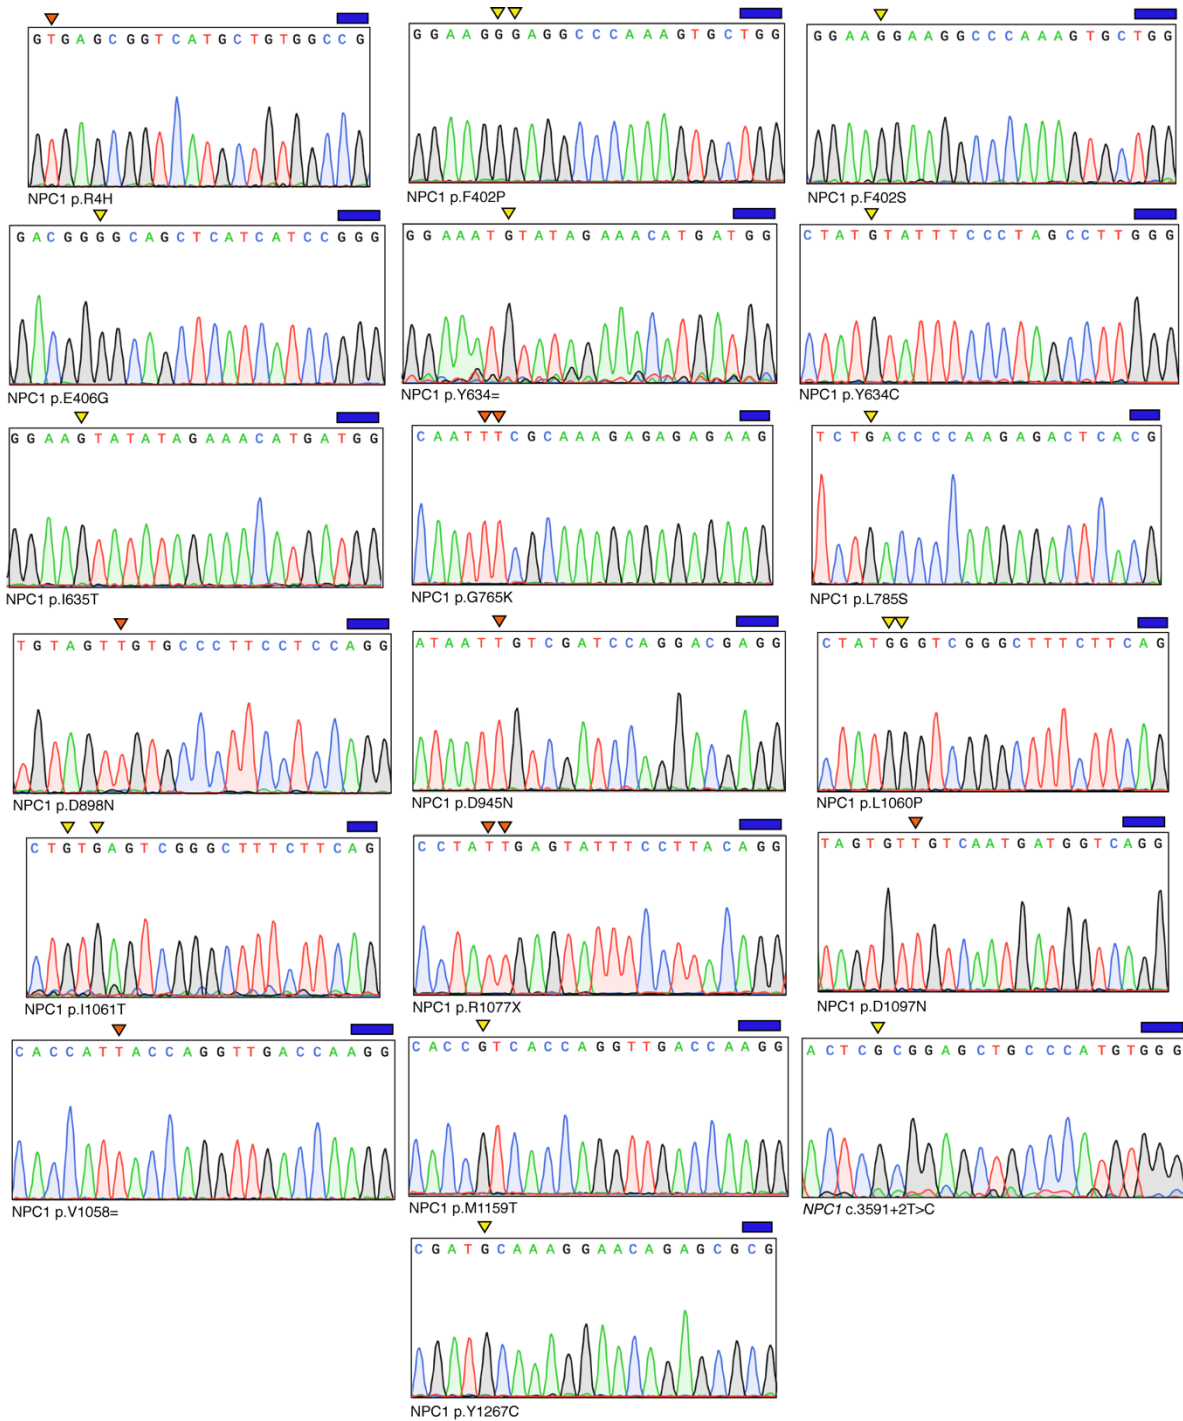

**Supplemental Figure S3. Variant generation was confirmed via Sanger sequencing.** Sequencing reads from each variant modelled, showing the sgRNA binding site and associated PAM sequence. Mutated nucleotides are marked with a colored arrowhead. Yellow arrowheads indicate a change made via adenine base editing, while orange arrowheads indicate a change made via cytosine base editing. The blue bar indicates the PAM sequence of the targeted region.

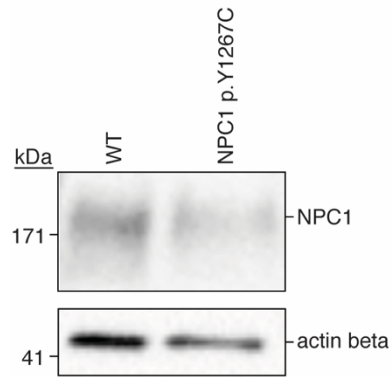

**Supplemental Figure S4. Expression of NPC1 protein expression in NPC1 p.Y1267C.** Expression of NPC1 protein was assayed using an N-terminal antibody. Actin beta was used as a loading control.

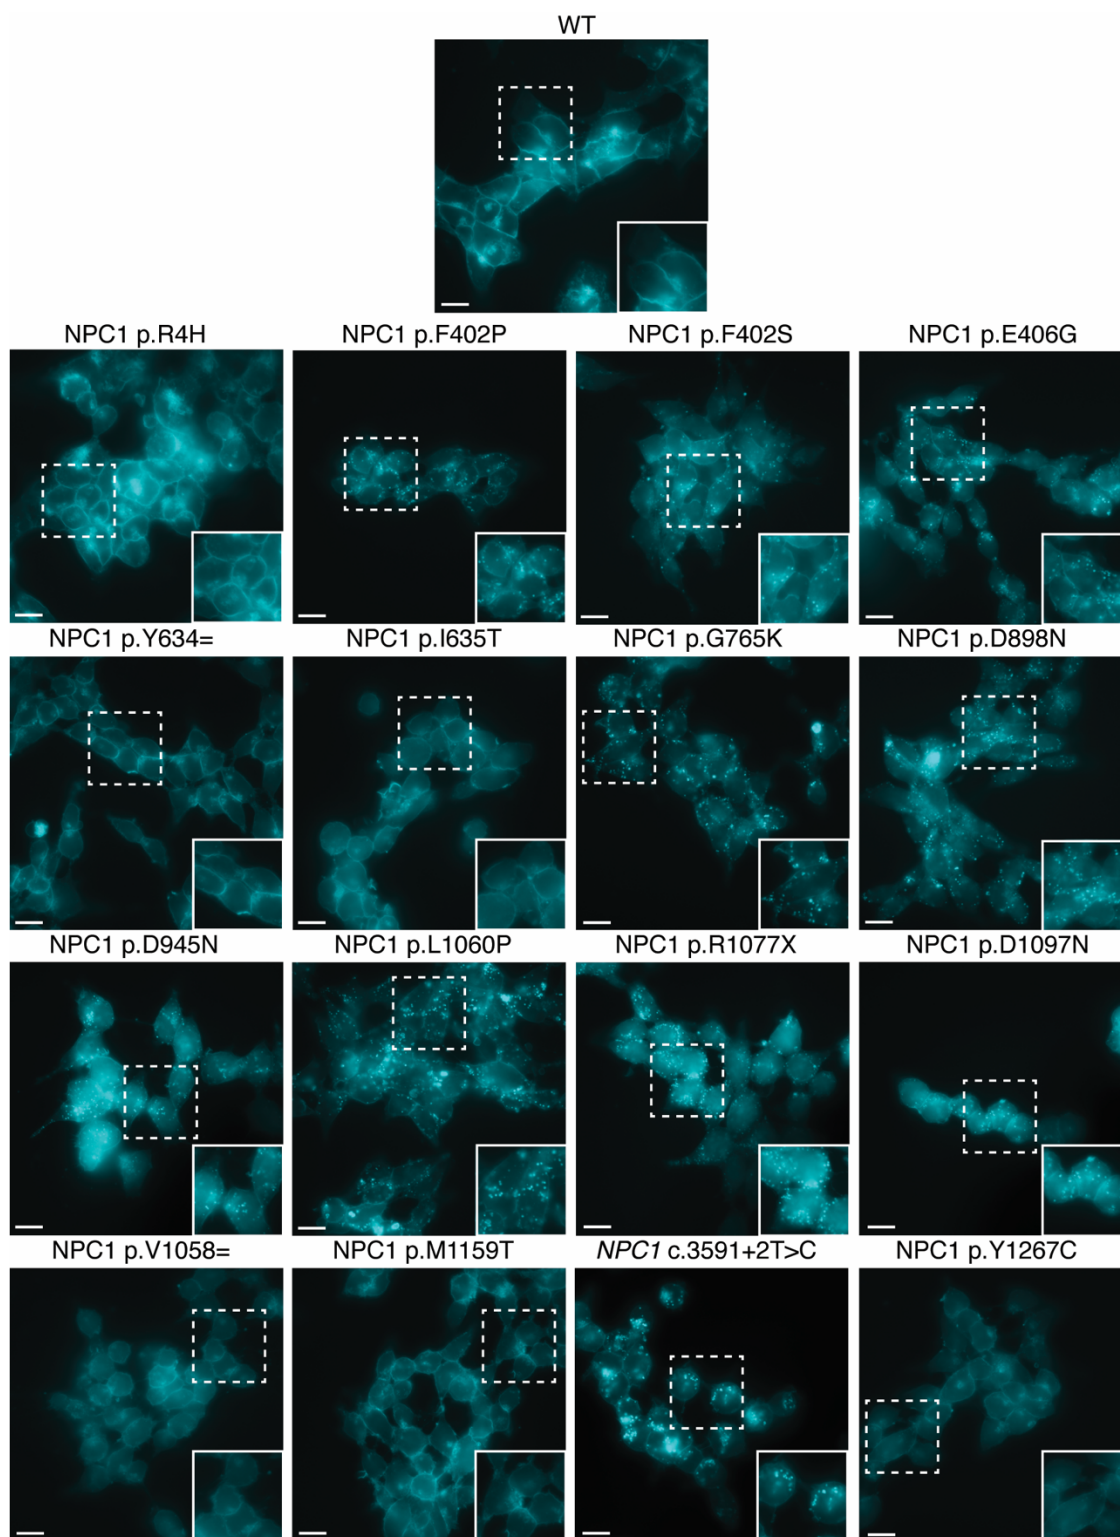

**Supplemental Figure S5. Functional characterization of NPC1 variants by filipin staining.** White dashed-bordered box has been enlarged twofold and inset at bottom right. Scale bars: 13 $\mu$ m.

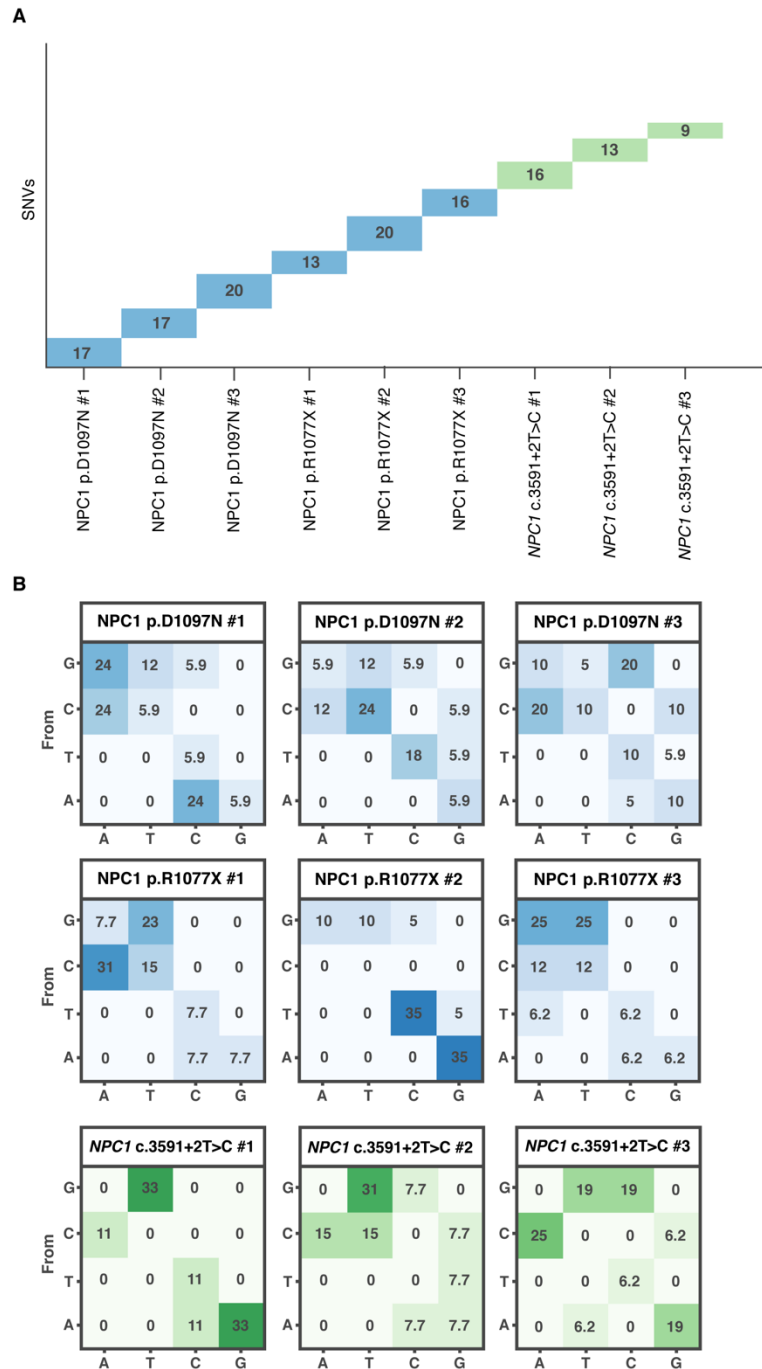

**Supplemental Figure S6. Evaluation of off-target editing by CRISPR-Cas9-mediated base editing.** RNA-sequencing was performed to evaluate off-targeting editing in the transcriptome of a subset of the NPC models generated. (A) Mutations found in the transcriptome of each cell model ranged in number from 9 to 20 mutations and all were non-overlapping. (B) Heatmaps indicating the specific base changes found in variant calling of RNA-sequencing. Specific nucleotide substitution frequencies appear random. (A, B) Blue colours indicate models where cytosine base editors were used and green colours indicate models where adenine base editors were used.
